# Supplementary material for: Phenotype - Chemotype Correlation of the Herb Bletilla Rchb. f. Based on a Comprehensive Evaluation of Thirty- Three Geographic Populations
Source: Research Square preprint supplement (doi:10.21203/rs.3.rs-933584/v1), 2021-10-21
Supplement: Supplementary file 3 [file da5ff506e67ef3d2ef359780.xlsx]

## Sheet: Sheet5
	No.	Population code	Plant height (cm)			Leaf blade length (cm)			Leaf blade width (cm)			Leaf number			Stem diameter (mm)			Inflorescence height (cm)			Inflorescence length (cm)			Flower number			Fruit number
			2018	2019	2020	2018	2019	2020	2018	2019	2020	2018	2019	2020	2018	2019	2020	2018	2019	2020	2018	2019	2020	2018	2019	2020	2018	2019	2020
	1	GXHZ	33.88±8.31	36.03±5.38	42.43±6.05	30.65±3.46	31.00±3.54	29.30±4.53	7.26±2.11	7.10±1.27	7.98±1.65	4.08±0.47	5.57±1.14	5.20±6.16	7.48±1.65	7.52±0.90	7.31±1.33	43.20±6.58	36.43±6.53	42.95±6.01	30.03±5.01	31.73±3.95	35.43±6.31	11.26±2.80	8.87±2.60	10.40±1.77	3.11±1.40	1.81±0.69	1.33±0.48
	2	GXLY	14.50±5.19	15.20±3.05	19.44±4.22	20.10±5.92	16.70±3.83	22.00±4.06	2.25±0.54	2.47±0.92	2.83±0.35	2.90±0.57	3.20±0.92	3.33±0.50	2.48±0.83	2.75±0.38	3.18±0.47	N/A	13.80±2.78	24.89±3.48	N/A	17.30±3.89	20.89±3.06	N/A	2.90±0.88	3.67±0.50	N/A	1.00±0.00	1.00±0.00
	3	YNBS	28.40±6.34	32.80±3.11	35.00±3.00	32.60±2.88	35.00±2.00	36.33±1.53	3.90±1.14	5.10±0.42	4.17±0.29	3.60±0.55	4.20±0.45	4.00±0.00	4.46±1.38	4.69±0.33	4.79±0.37	47.00±6.06	35.20±4.09	50.33±4.73	35.00±8.12	38.80±5.26	43.67±3.51	7.25±2.06	3.40±0.55	9.00±1.00	1.75±0.96	1.00±0.00	1.00±0.00
	4	GZZY	33.06±8.16	37.53±3.81	35.82±6.63	34.94±4.55	36.20±7.85	34.18±4.41	4.65±0.96	5.47±0.72	5.35±0.86	3.53±0.51	4.80±0.77	3.71±0.47	5.69±1.04	6.23±0.37	5.58±0.86	41.60±10.85	40.67±4.89	48.88±6.90	38.07±7.66	36.67±3.77	39.76±5.13	7.73±2.69	9.47±1.92	9.00±0.87	3.07±1.39	1.92±0.67	2.38±0.87
	5	HNLS	29.20±6.72	32.20±2.86	40.40±7.00	30.80±2.68	29.00±1.58	31.16±5.70	6.00±0.79	5.60±0.42	6.14±0.73	3.40±0.55	4.00±0.00	3.68±0.48	5.64±0.58	5.80±0.34	6.39±0.58	45.40±4.56	40.20±1.92	47.12±6.01	32.20±3.35	36.40±3.36	36.32±5.60	12.40±2.61	10.00±2.00	11.04±1.57	3.00±1.41	1.40±0.55	1.36±0.50
	6	HNSZ	24.60±9.79	28.60±5.32	23.90±3.57	30.40±5.03	34.00±2.55	29.00±3.94	3.00±0.50	3.60±0.42	3.74±0.55	3.80±0.45	4.00±0.00	3.70±0.48	4.49±0.63	4.97±0.22	4.41±0.63	N/A	29.80±3.35	29.80±3.16	N/A	29.80±2.39	23.00±3.27	N/A	3.00±0.71	5.40±1.26	N/A	N/A	N/A
	7	HNCL	20.00±4.63	23.20±2.86	29.40±3.74	33.00±5.00	31.80±2.86	29.33±3.06	2.90±0.74	4.40±0.42	4.20±0.59	3.60±0.55	4.40±0.55	3.67±0.49	4.31±0.53	4.91±0.25	4.48±0.55	38.60±6.91	36.20±3.19	38.53±5.14	28.40±7.40	35.20±3.27	30.73±4.17	5.60±1.95	6.40±1.67	7.67±1.29	2.60±1.52	2.25±0.96	1.33±0.50
	8	YCWZ	34.80±3.83	30.38±4.69	40.88±3.48	34.80±3.70	31.88±3.68	33.50±4.44	4.20±0.45	4.56±0.68	4.50±0.45	3.00±0.71	2.88±0.35	3.63±0.52	5.04±0.64	4.02±0.59	5.88±0.57	50.33±4.16	40.38±7.25	51.38±7.46	34.00±1.00	35.63±4.63	40.63±5.15	8.00±0.00	8.75±0.89	8.50±0.53	3.00±0.00	1.00±0.00	1.00±0.00
	9	SCLS	16.90±6.98	22.60±5.86	23.75±4.96	23.75±4.05	23.70±3.99	24.13±4.32	3.05±1.37	3.08±0.61	3.44±1.24	3.40±0.60	3.66±0.60	3.50±0.52	3.49±1.28	3.53±0.97	3.96±0.95	25.63±6.09	22.20±4.27	31.38±5.66	22.75±8.08	23.30±5.41	21.56±5.25	5.63±1.69	4.15±0.99	5.00±0.97	1.50±0.55	1.11±0.32	1.13±0.35
	10	SCWY	23.00±4.69	28.75±7.37	26.00±4.32	32.50±3.79	32.00±4.24	32.50±3.51	3.75±0.87	4.63±0.48	4.75±0.29	3.00±0.00	3.25±0.50	3.00±0.00	4.50±0.90	4.60±1.02	5.45±0.45	67.00±0.00	52.33±2.08	56.00±5.16	53.00±0.00	42.00±3.61	46.50±3.11	15.00±0.00	6.67±1.16	10.75±0.96	3.00±1.41	2.50±0.71	2.00±0.00
	11	HBYL	28.75±8.72	31.07±6.44	41.68±9.18	31.25±7.40	29.03±6.88	42.16±7.89	4.86±1.31	3.92±1.04	5.43±1.46	4.50±0.66	4.73±0.74	4.52±0.51	6.03±1.36	5.72±1.32	6.18±1.09	33.47±10.76	32.30±8.21	50.43±1.474	26.70±10.06	28.27±6.88	41.82±9.45	7.90±2.80	5.33±2.22	10.60±3.41	2.35±1.62	1.50±0.60	1.00±0.00
	12	HBLC	26.12±7.63	29.22±4.54	30.43±6.56	29.83±6.10	30.56±3.81	24.52±7.25	4.50±0.84	4.96±0.69	4.92±1.12	3.79±0.68	4.07±0.68	4.14±0.78	4.85±1.13	4.69±0.67	5.96±0.87	34.15±8.42	30.56±6.42	41.74±7.02	28.41±8.62	30.22±6.03	32.86±7.38	8.24±3.33	7.52±1.85	9.26±1.42	2.23±1.27	1.25±0.45	1.00±0.00
	13	HBXE	24.19±5.53	28.55±3.10	25.34±5.86	31.78±4.51	29.20±3.00	34.00±6.61	5.30±1.46	5.30±1.01	5.40±1.24	3.50±0.67	4.05±0.89	3.62±0.62	4.63±1.03	5.05±0.61	4.99±1.03	36.29±5.10	29.10±4.95	36.69±6.10	27.39±5.72	27.90±3.89	28.52±6.34	7.00±1.84	3.95±1.00	7.93±1.58	2.75±1.16	1.09±0.30	1.00±0.00
	14	SYZS	19.55±6.09	23.50±3.75	26.69±4.48	27.94±6.41	24.00±3.80	32.08±1.93	3.65±1.39	4.60±0.82	5.31±0.52	3.97±0.61	4.25±0.64	4.38±0.51	4.95±1.74	5.12±0.67	5.91±1.29	46.36±8.82	26.45±5.83	49.46±6.25	37.07±8.67	27.20±5.23	41.77±6.21	10.86±2.28	4.90±0.91	10.85±1.46	2.40±1.07	1.00±0.00	1.00±0.00
	15	HBHF	15.50±5.71	20.00±2.20	24.44±5.32	22.00±5.44	23.87±2.79	20.90±4.10	3.04±1.16	4.20±0.83	4.56±0.68	3.56±0.93	4.17±0.70	3.95±0.72	4.26±1.86	4.21±0.41	5.68±1.39	27.85±8.54	21.47±4.26	32.23±5.66	22.62±6.69	21.00±4.41	22.62±4.97	8.46±2.90	4.57±1.04	8.62±1.93	2.11±1.17	1.38±0.51	1.21±0.42
	16	HBXS	19.50±7.65	22.40±3.21	24.22±5.78	24.00±3.67	25.20±3.27	26.44±2.55	3.67±1.25	4.00±0.71	5.28±0.71	3.58±0.52	4.00±1.00	4.00±0.00	4.25±0.99	4.87±0.75	5.42±0.66	31.67±9.71	28.40±2.07	32.89±2.98	23.17±9.13	26.40±6.27	32.11±4.46	8.33±2.34	8.40±2.70	9.11±1.17	1.60±0.55	1.00±0.00	1.00±0.00
	17	HBJS	20.65±7.55	28.37±4.69	20.47±4.92	28.03±6.50	26.73±3.33	24.56±5.77	3.69±1.15	4.77±0.80	4.82±0.85	4.15±0.86	4.63±0.85	4.15±0.70	5.15±1.65	5.48±0.61	5.18±1.19	36.13±7.43	27.93±5.56	30.62±5.18	27.31±7.52	26.73±3.53	24.97±5.41	9.75±2.91	5.37±1.50	8.68±1.27	2.90±1.45	1.31±0.63	1.20±0.42
	18	HBSN	27.00±7.24	30.10±3.62	28.88±5.09	29.55±5.08	29.63±5.00	28.10±5.23	5.73±1.24	5.48±0.84	5.08±0.90	3.68±0.57	5.17±0.79	3.60±0.50	5.98±1.57	6.01±0.90	6.03±0.90	42.84±9.61	30.73±3.96	34.50±5.82	37.19±7.51	28.93±3.79	35.58±5.78	10.94±2.68	5.76±1.94	9.08±1.87	2.97±0.96	1.74±0.81	1.20±0.41
	19	HBWH	24.32±6.92	28.75±3.52	33.84±3.32	28.47±5.65	29.50±4.78	26.32±3.28	5.61±1.24	5.13±0.68	5.58±1.19	3.68±0.58	4.67±0.49	4.05±0.71	6.36±1.06	5.74±0.68	6.49±0.80	33.36±9.22	29.00±4.63	39.95±3.31	23.18±8.16	28.50±3.42	31.95±3.01	9.45±2.58	4.17±1.03	10.37±1.54	1.33±0.58	1.20±0.45	1.00±0.00
	20	XSSC	16.29±5.79	20.00±4.90	21.86±4.10	25.71±6.70	38.75±5.38	19.43±1.99	3.64±1.68	3.25±0.29	4.07±0.79	3.00±1.29	3.25±0.96	3.57±0.79	3.68±1.36	3.82±1.13	4.17±0.56	19.67±2.52	22.00±8.49	26.00±2.65	17.67±8.14	20.00±4.24	20.86±2.34	7.67±1.53	7.50±2.12	8.43±0.79	2.00±1.00	2.50±2.12	2.00±1.00
	21	HBJM	20.70±6.67	22.10±2.49	25.96±5.64	31.39±7.08	31.75±2.45	29.39±4.26	2.93±0.71	3.75±0.57	3.72±0.62	3.70±0.64	4.40±0.94	3.74±0.69	3.88±0.89	4.14±0.34	4.21±0.81	29.00±9.51	24.20±5.30	31.43±5.19	26.00±12.94	24.95±5.29	26.87±5.40	8.40±2.61	5.15±1.90	9.35±1.07	2.00±0.00	1.22±0.44	2.27±1.01
	22	HBXG	41.93±8.41	38.53±5.30	37.18±4.38	42.13±7.30	39.60±4.26	35.09±3.73	6.13±1.09	6.60±0.93	6.64±1.38	3.27±0.46	5.87±1.06	4.82±1.78	6.15±1.00	6.37±0.51	7.81±0.68	36.17±7.14	32.33±3.11	38.73±11.13	31.17±5.46	30.07±3.08	32.00±6.07	7.50±10.5	7.60±2.29	7.86±1.95	2.83±1.17	1.83±0.75	1.00±0.00
	23	HBMC	30.48±7.79	35.24±5.89	31.64±8.42	35.40±6.31	30.00±3.73	31.88±7.51	4.18±1.13	5.04±0.82	4.98±1.08	3.28±0.61	4.36±1.04	3.72±0.46	5.06±0.95	6.11±0.64	5.32±0.79	29.67±10.86	36.00±5.97	38.00±8.56	33.17±6.24	36.64±7.20	32.92±6.98	6.50±2.74	3.88±0.88	8.76±1.79	3.33±3.01	1.00±0.00	2.54±0.88
	24	HBLT	39.80±4.97	41.80±2.59	42.77±3.68	42.20±4.32	36.80±3.83	39.38±3.12	6.00±1.06	5.90±0.42	6.35±0.88	4.00±0.71	4.00±0.00	4.38±0.65	7.40±1.17	7.70±0.30	7.19±0.72	55.00±9.85	45.00±5.92	51.85±3.95	33.60±12.36	44.20±7.56	41.31±3.86	7.80±1.10	6.20±1.79	8.15±0.69	2.60±1.82	1.50±0.58	2.14±1.07
	25	HBSY	22.60±5.64	27.80±1.48	34.47±4.37	35.60±7.09	39.00±2.74	30.35±3.08	4.40±0.65	5.30±0.45	5.15±0.66	3.60±0.55	4.00±0.00	3.65±0.49	4.70±0.84	4.92±0.33	4.94±0.70	N/A	30.20±1.92	41.00±4.78	N/A	27.60±2.07	31.71±4.09	N/A	3.80±0.45	5.94±1.34	N/A	1.00±0.00	1.40±0.55
	26	AHBZ	38.00±5.29	43.80±2.39	42.71±3.04	33.00±3.16	33.40±2.97	29.29±2.21	6.60±0.89	6.60±0.42	6.21±0.91	3.80±0.45	3.80±0.45	4.00±0.00	5.79±0.70	6.58±0.33	5.94±0.58	45.00±7.00	46.60±8.05	51.71±2.29	28.00±7.55	34.00±6.60	31.29±2.56	6.67±1.53	5.20±1.92	7.57±0.53	2.33±1.53	1.75±0.96	1.00±0.00
	27	JSNJ	23.18±3.89	22.75±2.92	24.00±2.75	25.77±3.72	26.75±3.37	25.30±3.77	5.50±1.65	5.06±1.35	4.45±0.76	3.32±0.65	3.38±0.52	3.60±0.52	5.28±1.38	5.40±1.19	4.31±0.69	35.40±5.94	38.50±9.19	29.80±2.49	24.20±5.07	29.00±0.00	18.20±2.90	6.80±1.30	8.00±1.41	8.80±0.92	2.00±1.00	3.50±2.12	2.88±0.35
	28	SXXX	17.81±9.17	22.73±7.82	21.22±4.27	22.50±5.96	23.93±6.30	19.00±3.97	2.25±0.41	3.33±0.45	2.44±0.46	3.50±0.97	4.60±0.63	3.33±0.71	2.98±0.85	3.27±0.65	3.46±0.68	28.00±9.90	23.13±7.22	15.11±6.13	22.50±9.19	25.47±5.18	11.67±5.07	6.00±0.00	3.93±1.16	4.78±0.97	3.00±0.00	1.20±0.45	1.00±0.00
	29	HNLS	31.60±6.99	32.60±5.81	33.07±6.29	29.60±3.91	30.00±1.58	35.79±4.58	3.80±0.91	4.90±0.65	4.82±0.37	3.60±0.55	4.20±0.45	3.93±0.27	4.51±1.37	4.86±0.21	5.86±0.73	55.00±0.00	40.20±7.05	44.00±7.23	43.00±0.00	39.60±4.04	35.21±6.78	9.00±0.00	5.60±0.89	9.07±0.92	1.00±0.00	1.00±0.00	1.00±0.00
	30	HNSZ	21.60±5.86	26.60±2.41	29.89±3.69	33.20±6.83	25.80±3.19	32.44±5.08	3.30±0.67	3.10±0.42	4.06±0.39	3.40±0.55	4.00±0.00	3.56±0.53	4.21±0.63	4.41±0.44	4.21±0.44	53.00±0.00	28.60±5.41	39.89±7.20	43.00±0.00	32.60±6.88	31.11±6.94	10.00±0.00	5.00±0.71	8.67±1.00	3.00±0.00	N/A	1.00±0.00
	31	HBWF	16.44±4.53	17.25±3.24	24.56±5.55	26.44±7.16	21.00±3.66	28.44±3.78	3.78±0.76	3.88±0.23	5.17±0.35	3.22±0.83	3.25±0.71	4.67±0.50	3.37±0.84	2.94±0.40	5.56±1.05	N/A	17.38±3.02	28.11±5.60	N/A	14.13±2.80	21.44±4.28	N/A	2.88±0.83	3.56±0.53	N/A	1.00±0.00	N/A
	32	SCLS	26.72±9.61	31.03±6.26	28.42±3.77	26.52±6.08	25.93±3.86	26.36±5.27	3.39±1.05	3.60±0.64	4.17±0.84	3.85±0.56	3.90±0.76	3.97±0.73	5.20±1.47	5.61±1.23	6.44±0.75	38.75±9.17	29.13±6.50	39.88±3.98	33.92±6.19	28.07±6.13	31.94±4.15	7.64±2.94	3.60±1.00	8.58±1.09	3.55±1.44	1.38±0.51	1.29±0.49
	33	SXZP	43.73±9.84	60.60±3.89	41.20±3.32	46.30±4.19	49.50±3.12	41.67±4.36	6.63±1.29	6.25±0.61	6.95±0.99	3.47±0.51	4.60±0.50	3.73±0.45	7.52±1.17	6.97±0.39	7.93±1.00	62.74±12.43	66.13±6.77	59.50±3.93	53.26±7.94	50.27±4.20	52.33±4.33	11.00±2.00	10.77±1.77	10.67±1.40	1.77±0.76	1.67±0.76	2.05±0.80
	N/A indicates the population did not grow inflorescence or fruit in that year
