# Supplementary material for: Phenotype - Chemotype Correlation of the Herb Bletilla Rchb. f. Based on a Comprehensive Evaluation of Thirty- Three Geographic Populations
Source: Research Square preprint supplement (doi:10.21203/rs.3.rs-933584/v1), 2021-10-21
Supplement: Supplementary file 4 [file ef322d8290f7d1fc506948e0.xlsx]

## Sheet: Sheet1
	No.	Population code	Species	Location	Locality	Latitude	Longitude
	1	GXHZ	B. striata	GuangXi Prov.	Hezhou City	24.4035	111.567
	2	GXLY			Gansi Town, Leye County, Baise City	24.36	106.28
	3	YNBS		YunNa Prov.	Baoshan City	25.112	99.1618
	4	GZZY		GuiZhou Prov.	Zunyi City	27.7254	106.927
	5	HNLS		HuNan Prov.	Shuilongba Town, Longshan County, Tujia-Miao Autonomous Prefecture of Xiangxi	29.4577	109.444
	6	HNSZ			Sangzhi County, Zhangjiajie City	29.3997	110.164
	7	HNCL			Cili County, Zhangjiajie City	29.4297	111.139
	8	YCWZ		JiangXi Prov.	Mabu Town, Wanzai County, Yichun City	28.0023	114.022
	9	SCLS		SiChuan Prov.	Shuangfu Town, Emeishan City, Leshan City	29.4035	103.293
	10	SCWY			Huae Mount, Wanyuan City, Dazhou City	32.7275	108.744
	11	HBYL		HuBei Prov.	Zhangshuping Town, Yili District, Yichang City	31.38	111.129
	12	HBLC			Maoba Town, Lichuan City, Enshi Tujia and Miao Autonomous Prefecture	30.0216	109.036
	13	HBXE			Qizimei Mount, Xuanen County, Enshi Tujia and Miao Autonomous Prefecture	30.01	109.043
	14	SYZS			Zhushan County, Shiyan City	32.2247	110.229
	15	HBHF			Wuyang Town, Hefeng County, Enshi Tujia and Miao Autonomous Prefecture	30.1865	110.199
	16	HBXS			Xinshan County, Yichang City	31.3448	110.508
	17	HBJS			Huaping Town, Jianshi County, Enshi Tujia and Miao Autonomous Prefecture	30.3997	110.005
	18	HBSN			Xinhua Town, Shennongjia Forestry District	31.5253	110.861
	19	HBWH			Wuhan Botanical Garden, Wuhan City	30.5453	114.424
	20	XSSC			Xinshan County, Yichang City	31.3484	110.759
	21	HBJM			Jinmen City	31.0355	112.199
	22	HBXG			Xiaogan City	30.9248	113.916
	23	HBMC			Macheng City, Huanggang City	31.1733	115.009
	24	HBLT			Luotian County, Huanggang City	31.0973	115.74
	25	HBSY			Fang County, Shiyan City	31.8374	110.605
	26	AHBZ		AnHui Prov.	Shitai County, Chizhou City	30.2786	117.298
	27	JSNJ		JiangSu Prov.	Zhongshan Botanical Garden, Nanjing City	32.0527	118.834
	28	SXXX		ShaanXi Prov.	Xixiang County, Hanzhong City	32.3353	107.271
	29	HNLS	B. ochracea	HuNan Prov.	Shuilongba Town, Longshan County, Tujia-Miao Autonomous Prefecture of Xiangxi	29.4577	109.444
	30	HNSZ			Sangzhi County, Zhangjiajie City	29.3997	110.164
	31	HBWF		HuBei Prov.	Houhe Town, Wufeng Tujia Autonomous County, Yichang City	30.4548	110.324
	32	SCLS		SiChuan Prov.	Shuangfu Town, Emeishan City, Leshan City	29.6705	103.493
	33	SXZP		ShaanXi Prov.	Zhenping County, Ankang City	32.525	109.327
